# Supplementary material for: Halloysite nanotubes@reduced graphene oxide composite for removal of dyes from water and as supercapacitors
Source: Royal Society of Chemistry journal article supplement (doi:10.1039/c3ta14594h), 2013-12-19
Supplement: c3ta14594h.pdf [file c3ta14594h.pdf]

## Electronic Supplementary Information (ESI) for Halloysite nanotubes@reduced graphene oxide composite for removal of dyes from water and supercapacitors

Yushan Liu,<sup>\*a</sup> Xiaoqing Jiang,<sup>a</sup> Baojun Li,<sup>a</sup> Xudong Zhang,<sup>a</sup> Tiezhu Liu,<sup>a</sup> Xiaoshe Yan,<sup>a</sup> Jie Ding,<sup>a</sup> Qiang Cai,<sup>b</sup> and  
Jianmin Zhang<sup>\*a</sup>

<sup>a</sup> College of Chemistry and Molecular Engineering, Zhengzhou University, 100 Science Road, Zhengzhou 450001,  
P R China

<sup>b</sup> Key Laboratory for Advanced Materials of Ministry of Education and College of Materials Science and  
Engineering, Tsinghua University, Beijing 100084, PR China

\*Corresponding author. E-mail: liuyushan@zzu.edu.cn and zhjm@zzu.edu.cn

### Experimental section

*Synthesis of graphene oxide.* Graphene oxide (GO) was synthesized using the following modified Hummer's method.<sup>S1</sup> Graphite (2 g) was mixed with concentrated H<sub>2</sub>SO<sub>4</sub> (69 mL) and the mixture was stirred for 30 min within an ice bath. KMnO<sub>4</sub> (8 g) was added very slowly into the dark suspension and the reaction mixture was stirred and sonicated for another 15 min under a reaction temperature of 20 °C. Then the ice bath was removed, and the mixture was stirred at 35 °C overnight. Distilled water was added to the pasty solution under magnetic stirring and the color of the solution turned to yellowish brown. After another 2 h of vigorous stirring, H<sub>2</sub>O<sub>2</sub> (30wt %, 25 mL) was added and the color turned golden yellow immediately. The mixture was washed with HCl (5 %) for several times and then deionized water until the solution became acid free. The reaction mixture was filtered and dried under vacuum at 65 °C. The GO was obtained as a gray powder and used for the further experimental.

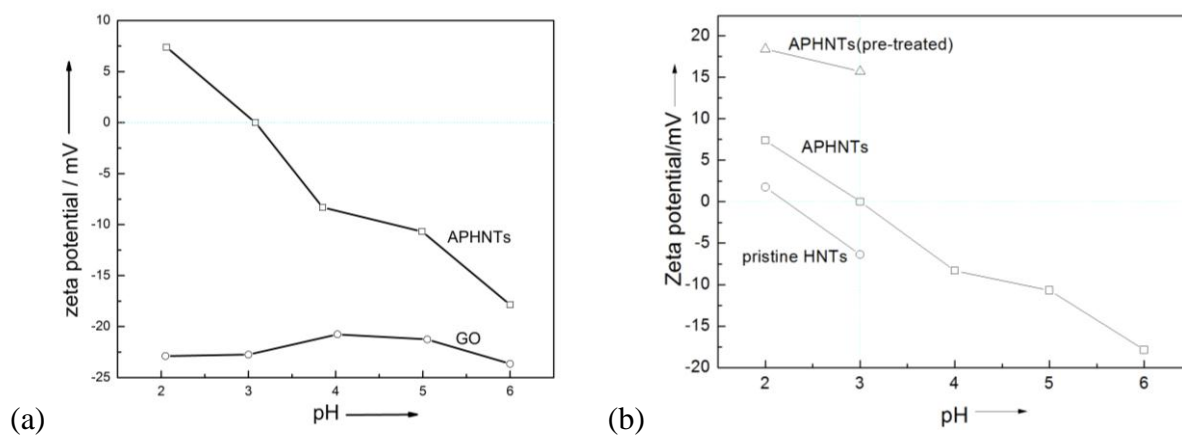

**Figure S1.** (a) Zeta potentials of GO and APHNTs; (b) Zeta potentials of pristine HNTs, APHNTS and APHNTs (pre-treated).

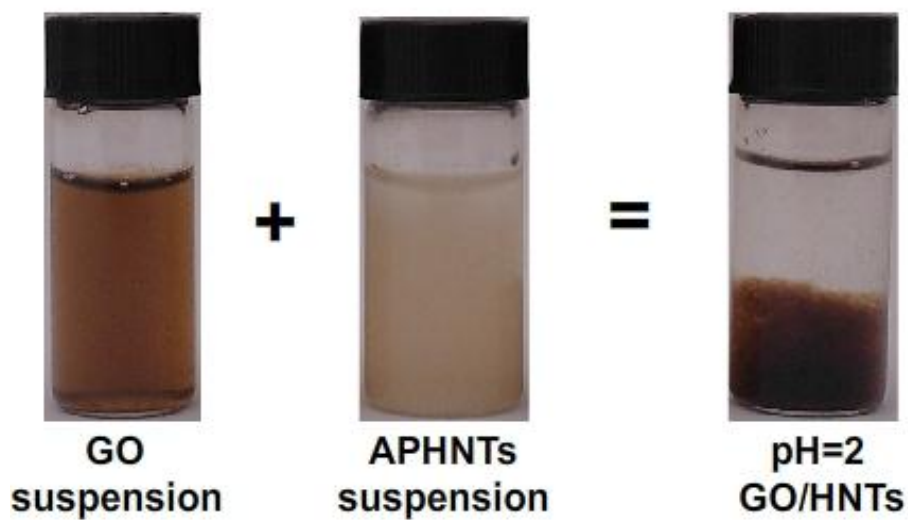

**Figure S2.** Photo images of APHNTs, GO suspension and GO/HNTs composite.

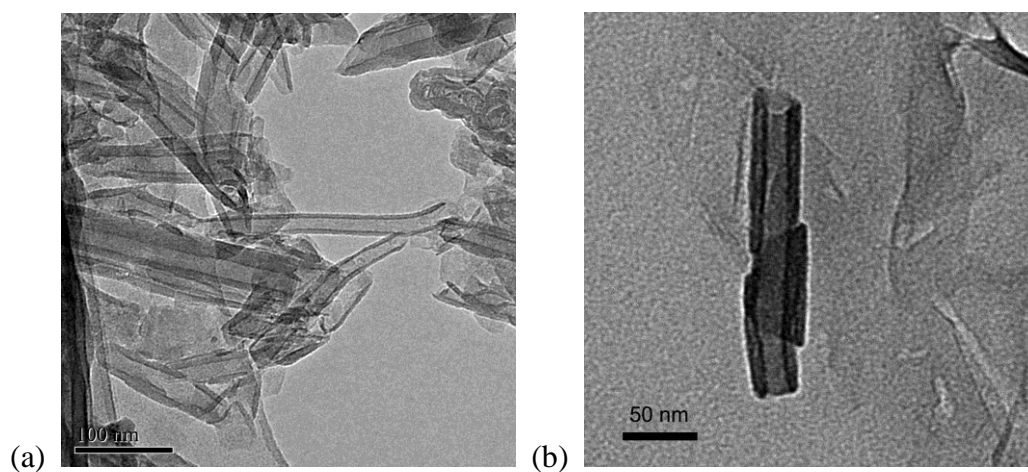

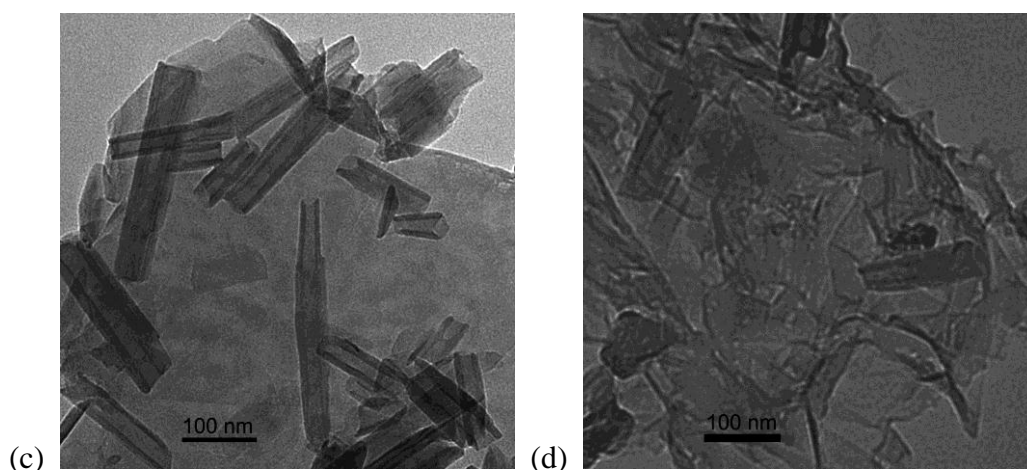

**Figure S3.** TEM images of (a) HNTs, and (b, c, d) HGC.

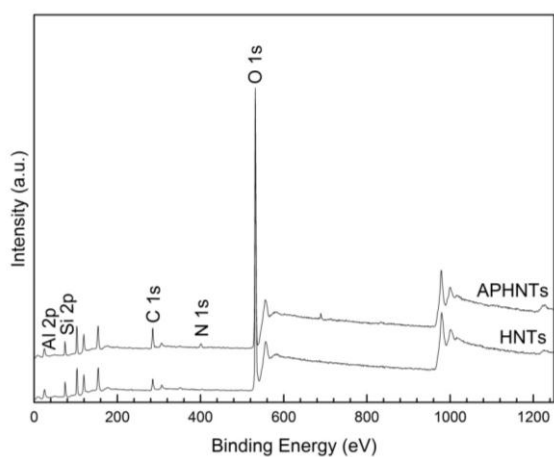

**Figure S4.** XPS spectra of HNTs and APHNTs.

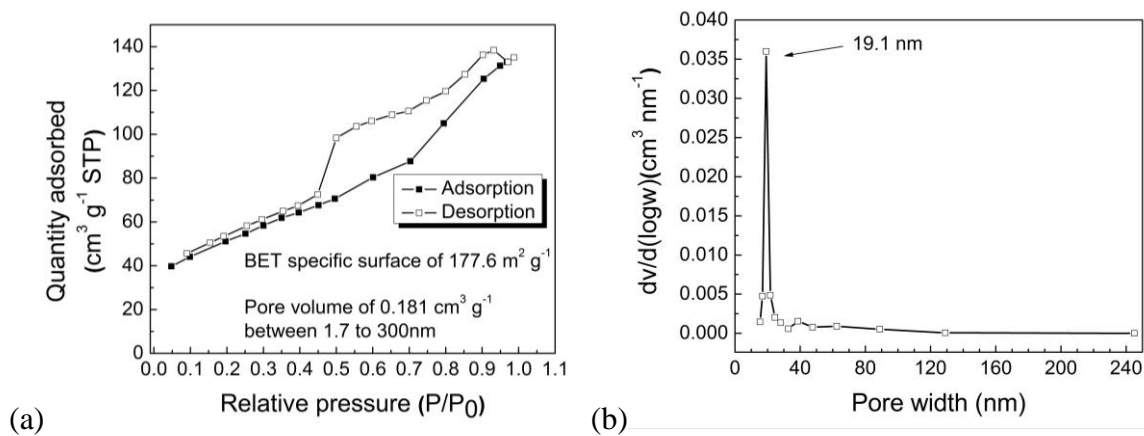

**Figure S5.** (a) Nitrogen adsorption desorption isotherms at 77K, and (b) pore width distribution of HGC.

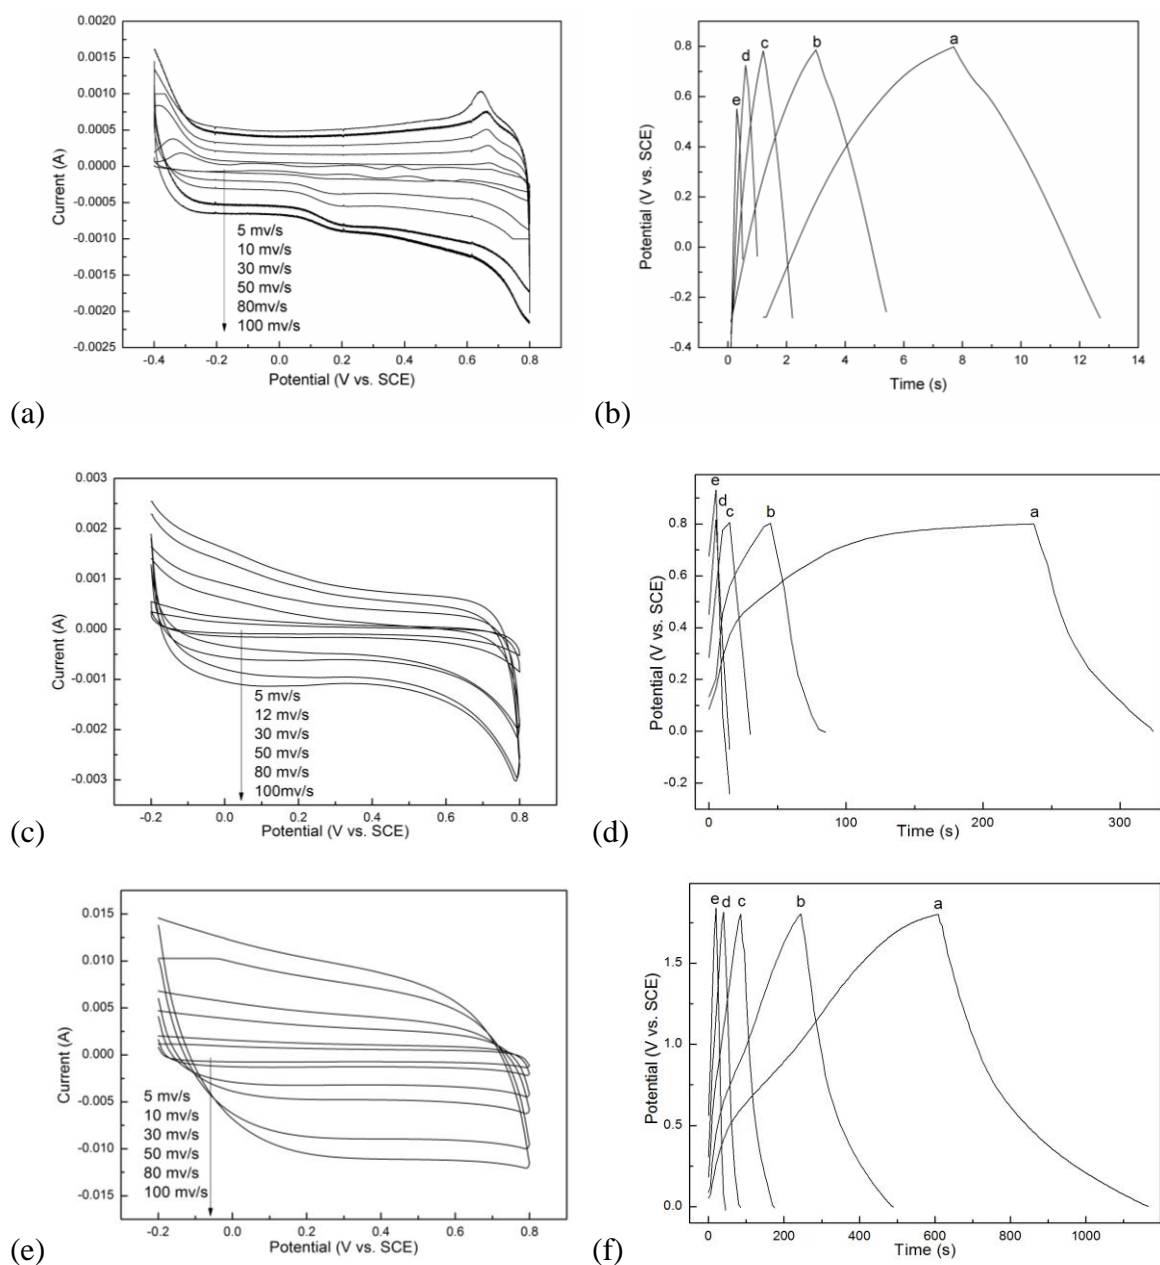

**Figure S6.** CV curves of (a) HNTs at different potential scan rates from 5 to 100  $\text{mV s}^{-1}$ ; (b) GCD curves of HNTs at different current densities, a: 100 mA/g, b: 200 mA/g, c: 500 mA/g, d: 1000 mA/g, e: 2000 mA/g; (c) GO at different potential scan rates from 5 to 100  $\text{mV s}^{-1}$ ; (d) GCD curves of GO at different current densities, a: 100 mA/g, b: 200 mA/g, c: 500 mA/g, d: 1000 mA/g, e: 2000 mA/g; (e) rGO at different potential scan rates from 5 to 100  $\text{mV s}^{-1}$ ; (f) GCD curves of rGO at different current densities, a: 100 mA/g, b: 200 mA/g, c: 500 mA/g, d: 1000 mA/g, e: 2000 mA/g.

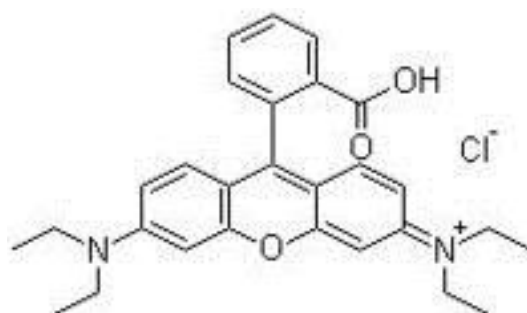

**Figure S7.** The molecule structure of RhB.

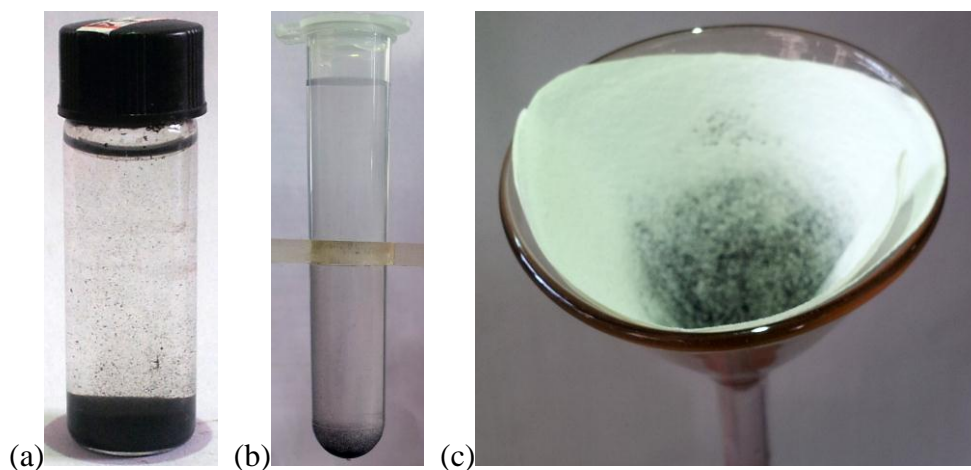

**Figure S8.** Photographs of different separation process: (a) sedimentation; (b) centrifugation; (c) filtration.

### References

- S1. W. S. Hummers and R. E. Offeman, *J. Am. Chem. Soc.*, 1958, **80**, 1339–1339.
- S2. S. Bose, T. Kuila, Md. E. Uddin, N. H. Kim, A. K.T. Lau, J. H. Lee, *Polymer*, 2010, **51**, 5921–5928.
